# Supplementary material
Source: publisher figshare collection journal article supplement (https://frontiersin.figshare.com/ndownloader/files/12995846)
Supplement: Supplementary file 1 [file 12995846]

**Design-Based Adjusted Correlated Factor Model**

TITLE:

Adjusted correlated factor

DATA:

FILE IS Learning_twolevel.csv;

VARIABLE:

!Needs clustering variables in dataset

NAMES ARE var1-var62 school district;

USEVARIABLES ARE var1-var62 school;

CATEGORICAL ARE var1-var62;

CLUSTER = school;

ANALYSIS:

!Using Design based function for complex sampling, not two-level function

TYPE IS COMPLEX;

ESTIMATOR IS WLSMV;

MODEL:

!Loadings estimated

ASSESS BY var1-var9*;

COLLAB BY var10-var18*;

COMMUN BY var19-var30*;

CREATE BY var31-var35*;

FEEDBA BY var36-var41*;

INTERDISC BY var42-var45*;

LEARN2L BY var46-var49*;

PROBSOLVE BY var50-var53*;

REALWORLD BY var54-var62*;

!Thresholds estimated

[var1$1-var62$1]

[var1$2-var62$2]

[var1$3-var62$3]

!Latent Mean = 0

[ASSESS@0];

[COLLAB@0];

[COMMUN@0];

[CREATE@0];

[FEEDBA@0];

[INTERDISC@0];

[LEARN2L@0];

[PROBSOLVE@0];

[REALWORLD@0];

!Latent variance = 1

ASSESS@1;

COLLAB@1;

COMMUN@1;

CREATE@1;

FEEDBA@1;

INTERDISC@1;

LEARN2L@1;

PROBSOLVE@1;

REALWORLD@1;

OUTPUT:

STDYX Residual;

TECH1;

MODINDICES;

PLOT:

TYPE = PLOT1;

TYPE = PLOT2;

TYPE = PLOT3;

**Two-level Configural Correlated Factor Model**

TITLE:

Two-level config correlated factor

DATA:

FILE IS Learning_twolevel.csv;

VARIABLE:

NAMES ARE var1-var62 school district;

USEVARIABLES ARE var1-var62 school;

CATEGORICAL ARE var1-var62;

CLUSTER = school;

ANALYSIS:

!Using two-level function

TYPE = TWOLEVEL;

ESTIMATOR IS WLSMV;

MODEL:

%Within%

!Loadings estimated and named to set equal across levels

ASSESS BY var1-var9*

var1(1)

var2(2)

var3(3)

var4(4)

var5(5)

var6(6)

var7(7)

var8(8)

var9(9);

COLLAB BY var10-var18*

var10(10)

var11(11)

var12(12)

var13(13)

var14(14)

var15(15)

var16(16)

var17(17)

var18(18);

COMMUN BY var19-var30*

var19(19)

var20(20)

var21(21)

var22(22)

var23(23)

var24(24)

var25(25)

var26(26)

var27(27)

var28(28)

var29(29)

var30(30);

CREATE BY var31-var35*

var30(30)

var31(31)

var32(32)

var33(33)

var34(34)

var35(35);

FEEDBA BY var36-var41*

var36(36)

var37(37)

var38(38)

var39(39)

var40(40)

var41(41);

INTERDISC BY var42-var45*

var42(42)

var43(43)

var44(44)

var45(45);

LEARN2L BY var46-var49*

var46(46)

var47(47)

var48(48)

var49(49);

PROBSOLVE BY var50-var53*

var50(50)

var51(51)

var52(52)

var53(53);

REALWORLD BY var54-var62

var54(54)

var55(55)

var56(56)

var57(57)

var58(58)

var59(59)

var60(60)

var61(61)

var62(62);

!Latent variance = 1

ASSESS@1;

COLLAB@1;

COMMUN@1;

CREATE@1;

FEEDBA@1;

INTERDISC@1;

LEARN2L@1;

PROBSOLVE@1;

REALWORLD@1;

!No thresholds or latent means at student level

%Between%

!Loadings estimated and named to set equal across levels, latent names indicate school level

SchASSESS BY var1-var9*

var1(1)

var2(2)

var3(3)

var4(4)

var5(5)

var6(6)

var7(7)

var8(8)

var9(9);

SchCOLLAB BY var10-var18*

var10(10)

var11(11)

var12(12)

var13(13)

var14(14)

var15(15)

var16(16)

var17(17)

var18(18);

SchCOMMUN BY var19-var30*

var19(19)

var20(20)

var21(21)

var22(22)

var23(23)

var24(24)

var25(25)

var26(26)

var27(27)

var28(28)

var29(29)

var30(30);

SchCREATE BY var31-var35*

var30(30)

var31(31)

var32(32)

var33(33)

var34(34)

var35(35);

SchFEEDBA BY var36-var41*

var36(36)

var37(37)

var38(38)

var39(39)

var40(40)

var41(41);

SchINTERDISC BY var42-var45*

var42(42)

var43(43)

var44(44)

var45(45);

SchLEARN2L BY var46-var49*

var46(46)

var47(47)

var48(48)

var49(49);

SchPROBSOLVE BY var50-var53*

var50(50)

var51(51)

var52(52)

var53(53);

SchREALWORLD BY var54-var62

var54(54)

var55(55)

var56(56)

var57(57)

var58(58)

var59(59)

var60(60)

var61(61)

var62(62);

!Latent Mean = 0

[SchASSESS@0];

[SchCOLLAB@0];

[SchCOMMUN@0];

[SchCREATE@0];

[SchFEEDBA@0];

[SchINTERDISC@0];

[SchLEARN2L@0];

[SchPROBSOLVE@0];

[SchREALWORLD@0];

!Latent variance = 1

SchASSESS@1;

SchCOLLAB@1;

SchCOMMUN@1;

SchCREATE@1;

SchFEEDBA@1;

SchINTERDISC@1;

SchLEARN2L@1;

SchPROBSOLVE@1;

SchREALWORLD@1;

!Thresholds estimated

[var1$1-var62$1]

[var1$2-var62$2]

[var1$3-var62$3]

OUTPUT:

STDYX Residual;

TECH1;

MODINDICES;

PLOT:

TYPE = PLOT1;

TYPE = PLOT2;

TYPE = PLOT3;

**Two-level Shared Correlated Factor Model**

TITLE:

Two-level shared correlated factor

DATA:

FILE IS Learning_twolevel.csv;

VARIABLE:

NAMES ARE var1-var62 school district;

USEVARIABLES ARE var1-var62 school;

CATEGORICAL ARE var1-var62;

CLUSTER = school;

ANALYSIS:

TYPE = TWOLEVEL;

ESTIMATOR IS WLSMV;

MODEL:

%Within%

!All observed covariances in the within (student) level for the scales. Saturated for the scales.

!ASSESS scale covariances

var1 with var2-var9;

var2 with var1 var3-var9;

var3 with var1 var2 var4-var9;

var4 with var1-var3 var5-var9;

var5 with var1-var4 var6-var9;

var6 with var1-var5 var7-var9;

var7 with var1-var6 var8-var9;

var8 with var1-var7 var9;

var9 with var1-var8;

!COLLAB scale covariances

var10 with var11-var18;

var11 with var10 var12-var18;

var12 with var10-var11 var13-var18;

var13 with var10-var12 var14-var18;

var14 with var10-var13 var15-var18;

var15 with var10-var14 var16-var18;

var16 with var10-var15 var17-var18;

var17 with var10-var16 var18;

var18 with var10-var17;

!COMMUN scale covariances

var19 with var20-var30;

var20 with var19 var21-var30;

var21 with var19-var20 var22-var30;

var22 with var19-var21 var23-var30;

var23 with var19-var22 var24-var30;

var24 with var19-var23 var25-var30;

var25 with var19-var24 var26-var30;

var27 with var19-var26 var28-var30;

var28 with var19-var27 var29-var30;

var29 with var19-var28 var30;

var30 with var19-var29;

!CREATE scale covariances

var31 with var32-var35;

var32 with var31 var33-var35;

var33 with var31-var32 var34-var35;

var34 with var31-var33 var35;

var35 with var31-var34;

!FEEDBACK scale covariances

var36 with var37-var41;

var37 with var36 var38-var41;

var38 with var36-var37 var39-var41;

var39 with var36-var38 var40-var41;

var40 with var36-var39 var41;

var41 with var36-var40;

!INTERDISC scale covariances

var42 with var43-var45;

var43 with var42 var44-var45;

var43 with var42 var44-var45;

var44 with var42-var43 var45;

var45 with var42-var44;

!Learn2Learn scale covariances

var46 with var47-var49;

var47 with var46 var48-var49;

var48 with var46-var47 var49;

var49 with var46-var48;

!PROBSOLVE scale covariances

var50 with var51-var53;

var51 with var50 var52-var53;

var52 with var50-var51 var53;

var53 with var50-var52;

!REALWORLD scale covariances

var54 with var55-var62;

var55 with var54 var56-var62;

var56 with var54-var55 var57-var62;

var57 with var54-var56 var58-var62;

var58 with var54-var57 var59-var62;

var59 with var54-var58 var60-var62;

var60 with var54-var59 var61-var62;

var61 with var54-var60 var62;

var62 with var54-var61;

%Between%

!Loadings estimated at the between (school) level, not the within (individual level)

SchASSESS BY var1-var9*;

SchCOLLAB BY var10-var18*;

SchCOMMUN BY var19-var30*;

SchCREATE BY var31-var35*;

SchFEEDBA BY var36-var41*;

SchINTERDISC BY var42-var45*;

SchLEARN2L BY var46-var49*;

SchPROBSOLVE BY var50-var53*;

SchREALWORLD BY var54-var62;

!Latent Mean = 0

[SchASSESS@0];

[SchCOLLAB@0];

[SchCOMMUN@0];

[SchCREATE@0];

[SchFEEDBA@0];

[SchINTERDISC@0];

[SchLEARN2L@0];

[SchPROBSOLVE@0];

[SchREALWORLD@0];

!Latent variance = 1

SchASSESS@1;

SchCOLLAB@1;

SchCOMMUN@1;

SchCREATE@1;

SchFEEDBA@1;

SchINTERDISC@1;

SchLEARN2L@1;

SchPROBSOLVE@1;

SchREALWORLD@1;

!Thresholds estimated

[var1$1-var62$1]

[var1$2-var62$2]

[var1$3-var62$3]

OUTPUT:

STDYX Residual;

TECH1;

MODINDICES;

PLOT:

TYPE = PLOT1;

TYPE = PLOT2;

TYPE = PLOT3;
